# Supplementary material
Source: PubMed Central journal article supplement (PMC5930403)

**Supplementary Figure 2**

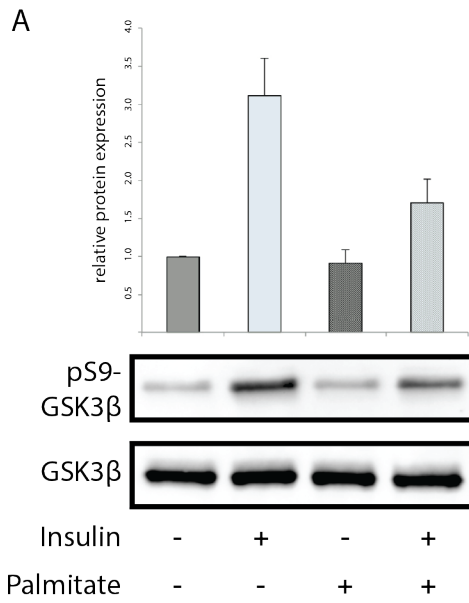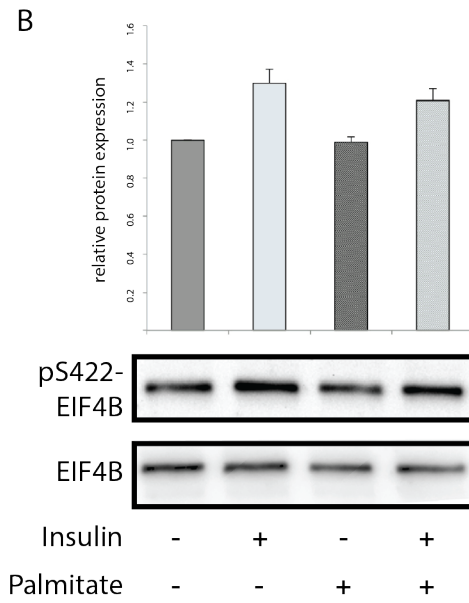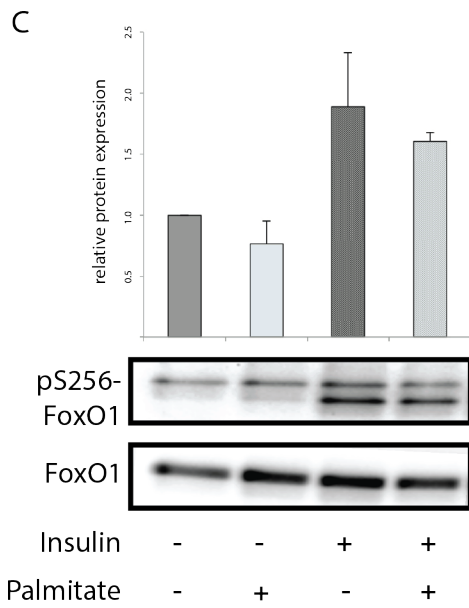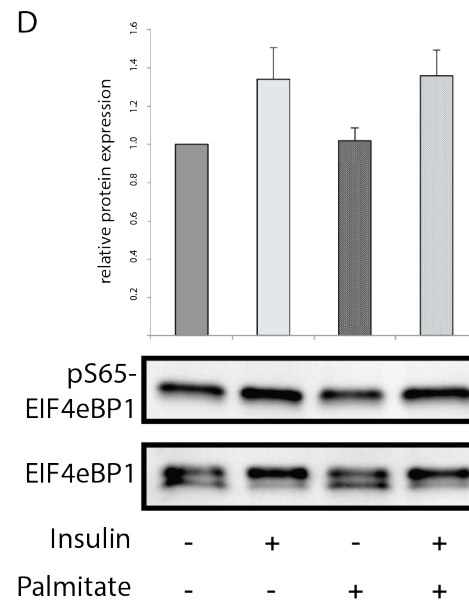

Supplement: supp_RA117.000560_134819_1_supp_67969_p3jjx5.pdf [file supp_RA117.000560_134819_1_supp_67969_p3jjx5.pdf]
